# Supplementary material
Source: PubMed Central journal article supplement (PMC6373462)
Supplement: NIHMS1005356-supplement-1.pdf [file NIHMS1005356-supplement-1.pdf]

## Supplement data

### Disruption of GPR35 Exacerbates Dextran Sulfate Sodium-induced Colitis in Mice

<sup>1</sup>#Shukkur M Farooq, PhD; <sup>2</sup>#Yuning Hou, PhD; <sup>1</sup>#Hainan Li, MS; <sup>1</sup>Megan O'Meara,  
<sup>1</sup>Yihan Wang, MS, <sup>2</sup>\*Chunying Li, PhD; <sup>1, 3</sup>\*Jie-Mei Wang, MD PhD.

<sup>1</sup> Department of Pharmaceutical Sciences, Eugene Applebaum College of Pharmacy and Health Sciences, Wayne State University, Detroit, MI; <sup>2</sup>Center for Molecular and Translational Medicine, Georgia State University, Atlanta, GA. <sup>3</sup>Centers for Molecular Medicine and Genetics, Karmanos Cancer Institute, Wayne State University, Detroit, MI.

Running Title: GPR35 in DSS-induced Colitis

#: Shukkur M Farooq, Hainan Li, and Yuning Hou contributed equally to this manuscript.

Supplemental Figure 1. GPR35 expression in the colon mucosa of GPR35<sup>+/+</sup> and GPR35<sup>-/-</sup> mice.

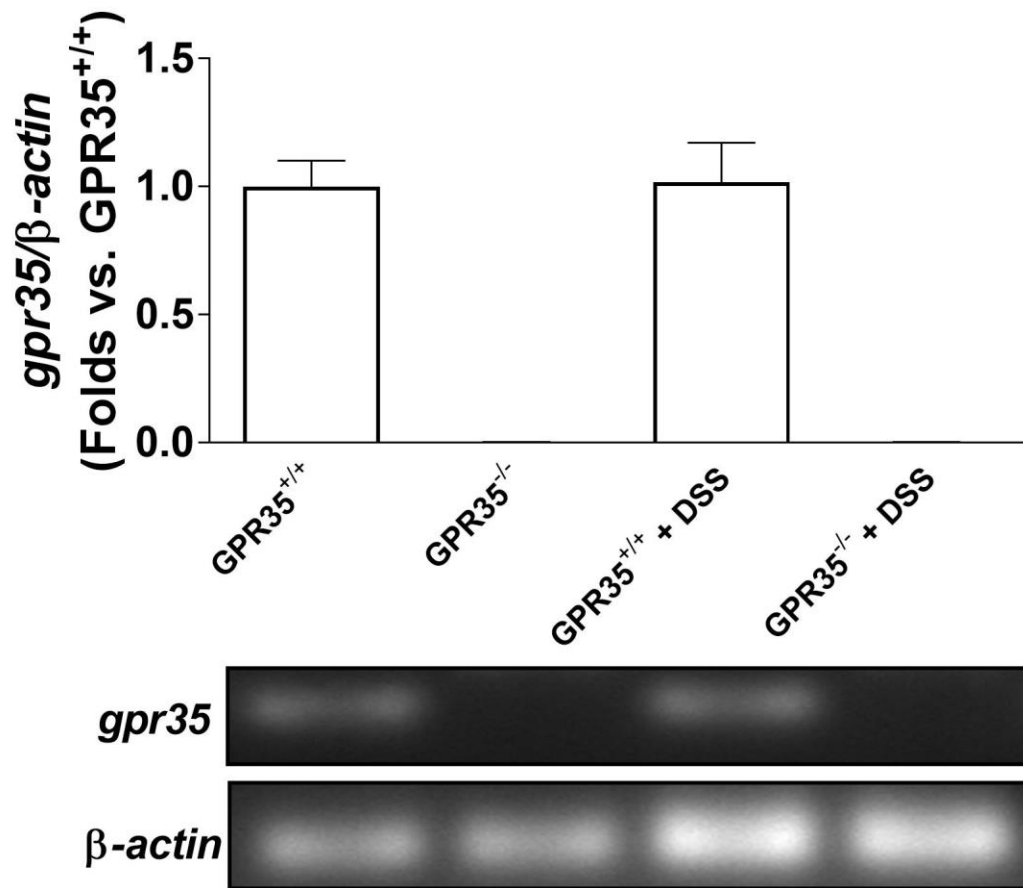

Total RNA was extracted from colonic mucosa in mice. Quantitative real-time-PCR (qPCRs) were performed using  $\beta$ -actin as internal control for each sample. QPCR-amplified products analyzed by agarose gel electrophoresis are shown in the lower panel. N (GPR35<sup>+/+</sup> alone) = 5, n (GPR35<sup>-/-</sup> alone) = 3, n (GPR35<sup>+/+</sup> + DSS) = 5, n (GPR35<sup>-/-</sup> + DSS) = 4.
